# Supplementary material
Source: PubMed Central journal article supplement (PMC6363831)
Supplement: NIHMS1512884-supplement-1.pdf [file NIHMS1512884-supplement-1.pdf]

**Supplementary Table S1. Comparison of mouse models.**

| Mice                                                                                | Small intestinal tumor count                     | Colon tumor count                                     | Tumors progressing to cancer | Lifespan                                 |
|-------------------------------------------------------------------------------------|--------------------------------------------------|-------------------------------------------------------|------------------------------|------------------------------------------|
| C57BL/6J<br><i>Apc<sup>Min/+</sup></i>                                              | 92 ± 4 (males)<br>103 ± 4 (females) <sup>a</sup> | 2.9 ± 0.2 (males)<br>1.6 ± 0.1 (females) <sup>a</sup> | 0% <sup>b</sup>              | Rarely survive beyond 120d <sup>c</sup>  |
| (FVB x B6)F1<br><i>Fc<sup>+</sup> Pik3ca<sup>p110*</sup></i>                        | None <sup>d</sup>                                | 1.4 <sup>d</sup>                                      | 100% <sup>e</sup>            | Majority moribund at 40-60d <sup>e</sup> |
| (FVB x B6)F1<br><i>Apc<sup>Min/+Fc<sup>+</sup></sup><br/>Pik3ca<sup>p110*</sup></i> | 5.7 <sup>d</sup>                                 | 2.9<br>(range 1-7) <sup>d</sup>                       | Not done                     | 52d<br>(range 42-82d) <sup>d</sup>       |
| (FVB x B6)F1<br><i>Apc<sup>fl/+Fc<sup>+</sup></sup><br/>Pik3ca<sup>p110*</sup></i>  | 6.7 <sup>d</sup>                                 | 2.8<br>(range 1-8) <sup>d</sup>                       | Not done                     | 56d<br>(range 35-76) <sup>d</sup>        |
| (FVB x B6)F1<br><i>Fc<sup>+</sup> Pik3ca<sup>H1047R</sup></i>                       | None <sup>f</sup>                                | 1.2 ± 1.4 <sup>f</sup>                                | 100% <sup>f</sup>            | >150d <sup>f</sup>                       |
| (FVB x B6)F1<br><i>Apc<sup>fl/+Fc<sup>+</sup></sup><br/>Pik3ca<sup>H1047R</sup></i> | Not done                                         | 4.9 ± 3.2 <sup>g</sup>                                | 75% <sup>g</sup>             | 121 ± 26d <sup>g</sup>                   |

<sup>a</sup>Amos-Landgraf JM et al., Proc Natl Acad Sci USA 2014;111:16514-9. Data shown as mean ± SEM.

<sup>b</sup>Halberg RB et al., Cancer Res 2009;69:5768-75.

<sup>c</sup>Moser AR et al., Science 1990;247:322-4.

<sup>d</sup>Deming DA et al., Oncogene 2014;33:2245-54. Data presented are means.

<sup>e</sup>Leystra AA et al., Cancer Res 2012;72:293106.

<sup>f</sup>Corrected from Yueh AE et al., PLoS One 2016; 11:e0148730. Data shown as mean ± SD.

<sup>g</sup>This study. Data shown as mean ± SD. Colon tumor counts for males (5.2 ± 3.6, n = 25) and females (4.6 ± 2.5, n = 34) are not significantly different (p = 0.9, 2-sided Wilcoxon rank sum test).
