# Supplementary material
Source: PubMed Central journal article supplement (PMC6363831)
Supplement: NIHMS1512884-supplement-2.pdf [file NIHMS1512884-supplement-2.pdf]

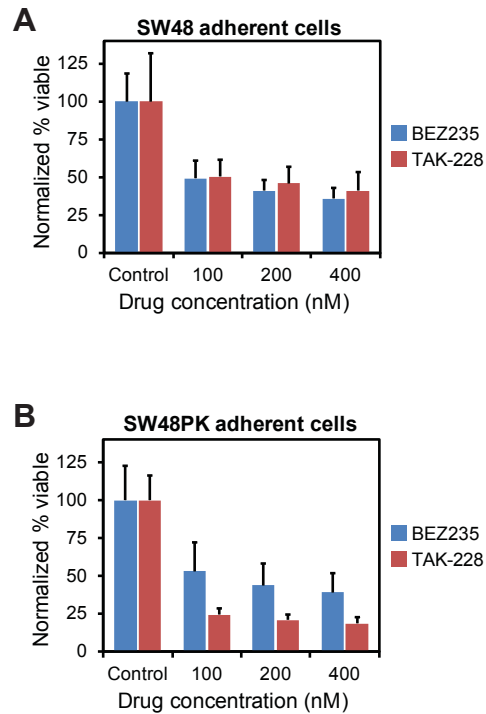

**Supplementary Figure S1.** MTORC1/2 inhibition suppresses growth of isogenic human colon cancer cells with and without the PIK3CAH1047R hotspot mutation. SW48 human colon cancer cells were treated with increasing concentrations of BEZ235, TAK-228 or control (A). The WST-1 cell proliferation assay was utilized to measure cell viability. Similarly, SW48 cells possessing the PIK3CAH1047R hotspot mutation (SW48PK) were treated with BEZ235, TAK-228, or control with response measured with the WST-1 assay (B).
